1 Metagenomic sequencing detects human  
2 respiratory and enteric viruses in air samples  
3 collected from congregate settings.

4 Mitchell D. Ramuta<sup>1‡</sup>, Nicholas R. Minor<sup>2‡</sup>, Miranda R. Stauss<sup>2</sup>, Olivia E. Harwood<sup>1</sup>, Savannah F.  
5 Brakefield<sup>1</sup>, Alexandra Alberts<sup>1</sup>, William C. Vuyk<sup>1</sup>, Max J. Bobholz<sup>1</sup>, Jenna R. Rosinski<sup>1</sup>, Sydney  
6 Wolf<sup>1</sup>, Madelyn Lund<sup>1</sup>, Madison Mussa<sup>1</sup>, Lucas J. Beversdorf<sup>3</sup>, Matthew T. Aliota<sup>4</sup>, Shelby L.  
7 O'Connor<sup>1,2</sup>, David H. O'Connor<sup>1,2\*</sup>

8  
9 <sup>1</sup> Department of Pathology and Laboratory Medicine, University of Wisconsin-Madison,  
10 Madison, WI, USA

11 <sup>2</sup> Wisconsin National Primate Research Center, Madison, WI USA

12 <sup>3</sup> City of Milwaukee Health Department Laboratory, Milwaukee, WI, USA

13 <sup>4</sup> Department of Veterinary and Biomedical Sciences, University of Minnesota, Twin Cities,  
14 Minneapolis, MN, USA

15  
16 ‡ These authors contributed equally.

17 \* Correspondence can be addressed to:

18 David H. O'Connor

19 [dhoconno@wisc.edu](mailto:dhoconno@wisc.edu)

20 555 Science Drive

21 Madison, WI USA 53711

## 22 Abstract

23 Innovative methods for evaluating viral risk and spread, independent of test-seeking behavior,  
24 are needed to improve routine public health surveillance, outbreak response, and pandemic  
25 preparedness. Throughout the COVID-19 pandemic, environmental surveillance strategies,  
26 including wastewater and air sampling, have been utilized alongside widespread individual-  
27 based SARS-CoV-2 testing programs to provide population-wide data. To date, environmental  
28 surveillance strategies have mainly relied on pathogen-specific detection methods to monitor  
29 viruses through space and time. However, this provides a limited picture of the virome present  
30 in a sample, leaving us blind to most circulating viruses. In this study, we explore whether  
31 virus-agnostic deep sequencing can improve the utility of air sampling to detect human viruses  
32 captured in air samples. We show that sequence-independent single-primer amplification  
33 sequencing of nucleic acids from air samples can detect common and unexpected human  
34 respiratory and enteric viruses, including influenza virus type A and C, respiratory syncytial  
35 virus, human coronaviruses, rhinovirus, SARS-CoV-2, rotavirus, mamastrovirus, and astrovirus.

## 36 Introduction

37 As of April 19th, 2023, over 1 billion SARS-CoV-2 diagnostic tests have been performed in the  
38 United States <sup>1</sup>. Deploying individual testing programs at this scale is extraordinarily expensive  
39 and resource-intensive. It is not sustainable, prompting the need for new virus monitoring  
40 strategies to overcome the challenges associated with individual testing.

41 Environmental surveillance strategies, such as wastewater and air sampling, do not rely on  
42 individualized testing and offer rapid and efficient ways to assess infection risk in communities  
43 and congregate settings <sup>2-5</sup>. Air sampling captures bioaerosols, making it possible to identify  
44 aerosolized viruses, bacteria, fungi, or other biological material<sup>6-9</sup>. Developing pathogen-  
45 agnostic detection methods that take advantage of air surveillance networks could improve  
46 surveillance in the absence of expensive, pathogen-specific individual testing. Despite the  
47 importance of airborne viruses to human disease transmission, only a few studies have used  
48 metagenomic sequencing to characterize them in the air of built environments <sup>10-14</sup>. These  
49 studies successfully detected viruses in various settings but found human-associated viruses  
50 in low abundance compared to other viruses. Prussin et al. characterized airborne viral  
51 communities in a daycare center's HVAC system over a year<sup>11</sup>. While bacteriophages and  
52 plant-associated viral families were abundant, commonly circulating human viruses accounted  
53 for less than 0.005% of the total relative abundance.

54 Technical challenges in characterizing human viruses in bioaerosols compared to other  
55 microbes has likely contributed to the limited research in this field <sup>15</sup>. Air samples capture low  
56 amounts of viral genetic material compared to other microbes, but the captured material is less  
57 compromised by the dilution effect and the PCR-inhibitor compounds present in wastewater  
58 samples <sup>16</sup>. Sampling for longer durations or at higher flow rates can increase biomass

59 collected but might negatively impact virus particle stability and genetic material integrity <sup>17</sup>.

60 Furthermore, bacteria and fungi have universal genetic marker regions (16S and internal

61 transcribed spacer (ITS) ribosomal RNA, respectively) that are typically used for studying these

62 microbial communities. Viruses lack a conserved viral gene marker for studying viral

63 communities, which requires unbiased amplification of genetic material <sup>18</sup>. Using metagenomic

64 sequencing techniques compatible with collected air samples could reveal underappreciated

65 viruses that are present in the environment. One especially promising method is sequence-

66 independent single-primer amplification (SISPA) <sup>19</sup>. SISPA sequencing has been demonstrated

67 to detect a wide range of viruses in clinical samples <sup>20</sup>.

68 In 2021, we reported the characterization of SARS-CoV-2 from air samples collected from

69 congregate spaces <sup>21</sup>. We additionally used a semi-quantitative PCR assay to assess 40 other

70 pathogens collected from the air. Detection and sequencing of pathogens in air with unbiased

71 approaches is key to understanding which other pathogens are present in the spaces around

72 us.

73 Here, we use SISPA to characterize a broad array of human pathogenic viruses from air

74 collected from congregate spaces. We focus on detecting and characterizing RNA viruses due

75 to their public health importance. Understanding human pathogens in built environments' air

76 may help elucidate illness trends in communities over time. This approach could enhance air

77 sampling as a tool for improving public health pathogen surveillance and preparedness against

78 emerging and re-emerging viruses.

## 79 Results

### 80 Study design

81 From July 2021 to December 2022, we deployed active air samplers in several community  
82 settings in the Upper Midwestern states of Wisconsin and Minnesota for routine pathogen  
83 monitoring. Thermo Fisher AerosolSense Samplers were used to collect air samples from high-  
84 traffic areas in several different congregate settings, including a preschool, campus athletic  
85 facility, emergency housing facility, brewery taproom, household, and five K-12 schools. Air  
86 samples were collected at weekly and twice-weekly intervals as previously described<sup>21</sup>. To  
87 demonstrate the feasibility of using pathogen-agnostic sequencing to detect human viruses  
88 captured in air samples in real-world settings, we analyzed a total of 22 air samples across the  
89 10 congregate settings (Table 1). We also processed three air sample filter substrates from  
90 unused AerosolSense cartridges, as no-template controls. Viral RNA was extracted from air  
91 samples, and complementary DNA (cDNA) was prepared using sequence-independent single  
92 primer amplification (SISPA) for Oxford Nanopore deep sequencing and metagenomic analysis.  
93 Sequencing reads were filtered for host and reagent contaminants and mapped to a viral  
94 RefSeq file downloaded from Genbank containing 835 human-associated viral genome  
95 sequences to look for common circulating RNA viruses (available on GitHub at  
96 [https://github.com/dholab/pathogen-agnostic-sequence-](https://github.com/dholab/pathogen-agnostic-sequence-analysis/blob/main/resources/ncbi_human_virus_refseq_20221011.masked.fasta)  
97 [analysis/blob/main/resources/ncbi\\_human\\_virus\\_refseq\\_20221011.masked.fasta](https://github.com/dholab/pathogen-agnostic-sequence-analysis/blob/main/resources/ncbi_human_virus_refseq_20221011.masked.fasta)).

## 98 Detection of human respiratory and enteric viruses

99 Deep sequencing detected human viruses in 19 out of 22 (86%) air samples. No human viruses  
100 were detected in any of the no-template controls. A viral hit was defined as multiple reads  
101 mapped to the viral reference sequence in at least two unique locations of the genome. A total  
102 of 13 human RNA viruses were detected in air samples (Table 1). We were able to detect  
103 several respiratory pathogens associated with frequent and seasonal illnesses that cause a  
104 burden on the healthcare system, including influenza virus type A and C, respiratory syncytial  
105 virus subtypes A and B, human coronaviruses (NL63, HKU1, and 229E), rhinovirus, and SARS-  
106 CoV-2 (Figure 1). Additionally, metagenomic analysis was able to identify human viruses  
107 associated with enteric disease, including rotavirus, human astrovirus, and mamastrovirus.  
108 Enteric viruses were detected in ten out of 22 (45%) air samples in this study. We observed the  
109 greatest abundance of human respiratory and enteric viruses at the preschool testing site. This  
110 is consistent with previous studies that have observed higher frequencies of infectious  
111 diseases among children in daycare and preschool facilities, especially respiratory diseases  
112 <sup>22,23</sup>. This highlights the ability of metagenomic sequencing to detect viruses that frequently  
113 circulate, as well as unexpected and understudied viruses.

## 114 Characterizing influenza C virus lineage in a preschool air sample

115 Using metagenomic analysis of air sample AE0000100A8B3C collected from the preschool, we  
116 detected sequences of all seven gene segments of influenza C virus (ICV), including  
117 hemagglutinin-esterase (HE), each of the genes encoding proteins for the polymerase complex  
118 (PB2, PB1, and P3), nucleoprotein (NP), matrix (M), and nonstructural protein (NS)  
119 (supplementary data 1). We wanted to further study this sample because of the unexpected  
120 number of ICV reads, which gave near-full genome sequences for each segment. Additionally,

121 ICV is an understudied respiratory virus. There are a total of 2,475 ICV sequences available in  
122 NCBI Virus (taxid:11552) and only 134 ICV sequences have been submitted from the United  
123 States in the 21st century. In order to further characterize the ICV isolate from air sample  
124 AE0000100A8B3C, we sequenced the sample's remaining SISPA prepared cDNA using the  
125 Oxford Nanopore GridION to obtain a greater depth of coverage across the ICV genome.  
126 Metagenomic sequencing on the GridION resulted in a greater depth of coverage across all  
127 viruses in the sample, including all seven ICV gene segments (supplementary data 1). These  
128 reads were used to create consensus sequences for each gene segment. Phylogenetic  
129 analysis was performed to compare the ICV detected in the air sample to 45 other ICV viruses  
130 that were obtained from GenBank (supplementary data 1). There are six genetic lineages for  
131 the HE gene and two lineages for all other gene segments (Figure 2; supplementary figure 1).  
132 Phylogenetic analysis was able to identify the viral lineage of each gene segment. HE grouped  
133 with the C/Kanagawa/1/76 lineage. PB2, PB1, M, and NS grouped with the C/Yamagata/81  
134 lineage. P3 and NP group with C/Mississippi/80 lineage. These data suggest that a genetic  
135 reassortment event, the exchange of genome segments between two different strains,  
136 occurred previously for this virus because it contains genetic segments from multiple different  
137 lineages. Frequent reassortment events have been previously observed for circulating ICV <sup>24</sup>.  
138 However, this is not a novel reassortant since the sequence clusters closely with influenza C  
139 virus C/Scotland/7382/2007 previously identified by Smith et al. (Figure 2; supplementary  
140 figure 1) <sup>25</sup>. These data demonstrate that metagenomic sequencing can be used to characterize  
141 understudied viruses collected in air samples, which could provide valuable information for  
142 improving public health awareness.

## 143 Longitudinal detection of human viruses in a preschool

144 Metagenomic analysis of air samples longitudinally collected from congregate settings can  
145 provide insight into changes in the prevalence of pathogens over time. These data could  
146 provide public health authorities valuable information to improve routine pathogen surveillance  
147 programs and outbreak investigations. To track the prevalence of viral genetic material from  
148 ICV and other human viruses in a preschool, we analyzed four air samples that were  
149 longitudinally collected from January 5, 2021, to March 1, 2022. ICV was first detected in an air  
150 sample collected from January 26th to February 1st, 2022. Viral reads in this sample mapped  
151 to three out of the seven gene segments including HE, PB2, and NS. Two air samples collected  
152 after February 1st, 2022, also contained reads that mapped to several ICV gene segments. ICV  
153 genetic material was detected at the highest abundance in the air sample collected from  
154 February 1st to the 8th with reads mapping to all seven gene segments (Table 1;  
155 supplementary data 1). Viral reads mapping to five of the seven gene segments, including PB2,  
156 PB1, P3, HE, and NP, were detected in an air sample collected from February 23rd to March  
157 1st. In contrast, human astrovirus genetic material was detected in three air samples collected  
158 between January 5th, 2021, to February 8th, 2022. Human astrovirus was not detected in the  
159 air sample collected from February 23, 2022, to March 1st, 2022. Similar to ICV, we see a peak  
160 and decline in viral reads for human astrovirus. These data suggest that metagenomic  
161 sequencing can be used to track the prevalence of multiple respiratory and enteric viruses in a  
162 congregate setting over time. This also shows that these are real virus detection signals and  
163 not just artifacts of a single sample at a single time point.



## 164 Detection of SARS-CoV-2 in RT-PCR-positive air samples

165 To explore whether metagenomic sequencing can detect a human virus that is known to be  
166 present in an air sample, we sequenced air samples with known SARS-CoV-2 status. Each  
167 AerosolSense cartridge comes with two filter substrates. One filter substrate from each air  
168 sample was tested by reverse transcription PCR (RT-PCR) to determine its SARS-CoV-2  
169 status. The other substrate was eluted in 500ul of PBS and stored at -80°C until it was  
170 processed for sequencing. Several different RT-PCR assays were used on samples included in  
171 this study, depending on when and where they were collected, as previously described<sup>21</sup>. Cut-  
172 off values used for determining if an air sample was positive, inconclusive, or negative for  
173 SARS-CoV-2 are described in the methods section.

174  
175 SISPA sequencing was able to detect SARS-CoV-2 reads in two out of 14 (14%) of the SARS-  
176 CoV-2 positive samples (Table 1; supplementary data 1). The percent of genome coverage  
177 varied between the two samples (6.5% and 46.7%). No SARS-CoV-2 reads were observed in  
178 any of the samples that were negative or inconclusive for SARS-CoV-2 by RT-PCR testing or  
179 with no template controls (supplementary data 1). An inconclusive result was defined as a  
180 sample with only amplification in one of the PCR targets. These data suggest that SISPA  
181 sequencing results are concordant with SARS-CoV-2 RT-PCR status. However, SISPA  
182 sequencing is not as sensitive as RT-PCR for detecting viral genomic material captured in the  
183 air samples.

## 184 Discussion

185 In this study, we used metagenomic sequencing to detect human RNA viruses captured in air  
186 samples collected from various congregate settings. Our results show that pathogen-agnostic  
187 sequencing can detect common and understudied respiratory and enteric viruses that circulate  
188 in the human population. Several studies have also detected enteric viruses in air samples from  
189 a daycare, wastewater treatment facility, and hospital <sup>11,14,26</sup>. Air samples can detect virus-  
190 containing bioaerosols that are produced by infected individuals when they breathe, speak,  
191 sneeze, cough, or talk. Enteric viruses are mainly transmitted through the fecal-oral route, but  
192 viral genetic material has been detected in oral swabs and saliva of infected individuals and in  
193 animal models <sup>27,28</sup>. Air samples can also detect microbe-containing bioaerosols from various  
194 secondary sources, such as plumbing systems (toilets, sinks, showers), resuspended dust,  
195 skin, or clothing <sup>7</sup>. This makes it difficult to determine the source of pathogens detected in the  
196 air samples from this study. Regardless of the source of the nucleic acids, the detection of  
197 enteric viruses in air samples demonstrates the potential for expanding air sampling as an  
198 environmental surveillance approach beyond respiratory viruses.

199  
200 Additionally, we demonstrate SISPA amplification and Oxford Nanopore sequencing can  
201 characterize viral genetic material in air samples to track circulating virus variants. Here, we  
202 successfully identified the lineages of all seven gene segments of an influenza C virus detected  
203 in a preschool. Influenza C virus is a lesser-studied influenza virus that is often excluded from  
204 routine respiratory pathogen surveillance programs, and highlights the limitations of pathogen-  
205 specific surveillance. Previous studies have shown a high seroprevalence of ICV in children  
206 increasing in age, suggesting that this is a common yet underestimated cause of respiratory  
207 illness <sup>24,29,30</sup>. The epidemiology of ICV remains poorly understood despite recent studies

208 showing its ubiquity <sup>24,31</sup>. The ICV results from this study highlight the potential of using air  
209 sample networks to identify and characterize unexpected and understudied viruses to improve  
210 public health awareness. Throughout history, human interest and difficulties associated with  
211 detecting viruses, such as ICV, have imposed biases on our knowledge of circulating viruses.  
212 Detecting active influenza C virus infections used to be difficult with cell culture techniques  
213 because ICV causes weak cytopathic effects. <sup>29</sup> This has likely led to an underestimation of  
214 disease burden. Advances in molecular detection technologies, such as pathogen-agnostic  
215 sequencing, could free us from these biases and provide a more comprehensive picture of  
216 circulating viruses.

217

218 Our study shows that we can use metagenomics from collected air samples to detect  
219 pathogens that were otherwise hidden from view. This is not surprising, as the entire field of  
220 metagenomics is intended to detect pathogens whose presence was not apparent. However,  
221 detection of hidden viruses in the air has not been extensively studied, despite the opportunity  
222 to seek out viruses in the environment that could have pathogenic consequences. Once  
223 detected by methods described in this paper, molecular detection assays can be created to  
224 more sensitively monitor the presence of these viruses within individuals, collected from the air,  
225 or located in other environmental samples. Metagenomics of collected air samples provides a  
226 window into what other pathogens are present and might be important for public health  
227 investigations.

228

229 Lessons learned during the COVID-19 pandemic have sparked interest in using environmental  
230 surveillance strategies for improving pandemic preparedness and outbreak response. Unlike  
231 wastewater surveillance, active air samplers are mobile, which makes it easy to quickly deploy  
232 air sampling networks in settings of interest such as health clinics, airplanes, ports of entry,

233 public transit, farms, K-12 schools, long-term care facilities, or emergency housing facilities <sup>32-</sup>  
234 <sup>34</sup>. These may be specific areas where public health agencies are interested in collecting  
235 airborne pathogens for assessing local, regional, or global outbreaks. Highlighting this potential  
236 application of air sampling, Mellon et al. recently deployed AerosolSense samplers in an  
237 outpatient clinic for patients suspected of mpox infection to look for mpox virus in the air <sup>35</sup>. Air  
238 sample results were concordant with the presence of patients diagnosed with mpox infections;  
239 future studies could extend this work to sequencing mpox virus from air samples to track  
240 evolution longitudinally.

241 Could a nationwide air surveillance network have been deployed in health clinics and other  
242 congregate settings to improve public health awareness early on in the COVID-19 pandemic  
243 response? It is tempting to speculate that air samplers at critical locations such as airports,  
244 hospitals, and aged care facilities could have provided sequence-agnostic detection of SARS-  
245 CoV-2 in a critical window when PCR testing of clinical samples was extremely limited. These  
246 data could have helped public health agencies make data-driven decisions early in the  
247 response.

248 Improvements in bioaerosol collection and sequencing technologies could significantly  
249 improve the ability to characterize viruses. The SARS-CoV-2 RT-PCR and sequencing data  
250 from this study shows that our current metagenomic sequencing approach is not optimally  
251 sensitive. Air samples contain high amounts of human, animal, and microbial ribosomal RNA  
252 (rRNA), likely associated with airborne microbes and host cells transported on dust particles <sup>36</sup>.  
253 Several studies have shown that rRNA depletion can improve the performance of unbiased  
254 sequencing techniques for recovering human RNA viruses from different matrices <sup>37</sup>, and  
255 should be considered for use with air samples. Alternatively, using capture-based probe  
256 hybridization may help enrich viral target sequences in the library preparation process. This

257 could limit the amount of background genomic material from host and other microbes.  
258 However, this is a more biased approach using probes specific for viral sequences of the target  
259 pathogens<sup>37</sup>. Commercial kits are available containing probes that cover 3,153 different viral  
260 genomes targeting ssRNA, dsRNA, dsDNA, and ssDNA viruses. These kits have been used  
261 with several different sample types to detect novel and common viruses, including human and  
262 animal specimens (nasal swabs and plasma), mosquitoes, and wastewater<sup>38-41</sup>. This approach  
263 shows promise for enriching viral reads in samples that contain high amounts of host genetic  
264 material. Future studies should evaluate using target enrichment approaches to improve the  
265 broad detection of human viruses in air samples.

266  
267 Virus-agnostic sequencing methods for air surveillance can be substantially improved, as  
268 technologies are evolving rapidly. Sequencing workflows need to be optimized to be high-  
269 throughput, cost effective, and have rapid result turnaround for widespread use with air  
270 surveillance programs. In this study we ran two Oxford Nanopore sequencing runs on the  
271 PromethION 24. The runs multiplexed 16 and 9 samples and had an output of 85 and 67  
272 Gbases per flow cell, respectively. The manufacturer estimates a maximal output of 290  
273 Gbases per flow cell when using newer sequencing kit chemistries<sup>42</sup>. Improving the  
274 sequencing yield to 200 Gbases could allow for multiplexing up to 32 air samples, while  
275 maintaining an average of 6 million Gbases per air sample. This could make sequencing more  
276 cost effective while maintaining a similar per sample output obtained in this study. Additionally,  
277 Oxford Nanopore sequencing enables real-time processing of sequencing data. This could  
278 help decrease the turnaround time for results since you do not have to wait the full 72 hour run  
279 time before downloading and analyzing the data. This rapid result turnaround time could be  
280 beneficial during outbreak response, when real-time data is essential.

281

282 Recent advances in metagenomic sequencing technologies have increased efforts to study  
283 microbial communities in built environments. This study demonstrates that metagenomic  
284 sequencing approaches can be used to track the prevalence of human respiratory and enteric  
285 viruses of public health importance in real-world settings. This approach could provide a more  
286 rapid and efficient method for providing community-wide pathogen surveillance data without  
287 relying on test-seeking behavior or pathogen-specific detection assays.

## 288 Methods

### 289 Air sample collection and processing

290 AerosolSense instruments (Thermo Fisher Scientific) were installed in a variety of indoor  
291 congregate settings to collect bioaerosols for pathogen surveillance from December 2021 to  
292 December 2023. AerosolSense instruments were placed on flat surfaces 1-1.5 meters off the  
293 ground in high-traffic areas of an athletics training facility, preschool, emergency housing  
294 facility, brewery taproom, and five K-12 schools in the Upper Midwestern States of Wisconsin  
295 and Minnesota. Air samples were collected using AerosolSense cartridges (Thermo Fisher  
296 Scientific) according to the manufacturer's instructions. The iOS and Android Askidd mobile  
297 app was used to collect air cartridge metadata and upload it to a centralized Labkey database,  
298 as previously described in Ramuta et al<sup>21</sup>. After the air samples were removed from the  
299 instruments, they were transferred to the lab for further processing. Two air sample substrates  
300 were removed from each of the AerosolSense cartridges using sterile forceps to place them in  
301 two separate 1.5 mL tubes containing 500  $\mu$ L of PBS. The tubes were vortexed for 20 seconds,  
302 centrifuged for 30 seconds, and stored at -80°C until RNA extraction and complementary DNA  
303 (cDNA) preparation.

304

## 305 Air sample total nucleic acid extraction and concentration

306 Total nucleic acids were extracted from air samples using the Maxwell 48 Viral Total Nucleic  
307 Acid Purification Kit (Promega) according to the manufacturer's recommendations. Briefly, 300  
308  $\mu\text{L}$  of air sample eluate was added to a 1.5  $\mu\text{L}$  tube containing 300  $\mu\text{L}$  of lysis buffer and 30  $\mu\text{L}$   
309 of Proteinase K. An unused air cartridge was processed with each Maxwell run to be used as a  
310 no-template control. The reaction mix was vortexed for 10 seconds and incubated at 56°C for  
311 10 minutes. Following the incubation, the tubes were centrifuged for 1 minute. Then 630  $\mu\text{L}$  of  
312 the reaction mix was added to the Maxwell 48 cartridges, which were loaded into a Maxwell 48  
313 instrument and processed with the Viral Total Nucleic Acid program. Nucleic acids were eluted  
314 in a final volume of 50  $\mu\text{L}$  of nuclease-free water. To clean and concentrate the viral RNA, 30  $\mu\text{L}$   
315 of extracted total nucleic acids were treated with TURBO DNase (Thermo Fisher Scientific) and  
316 concentrated to 10  $\mu\text{L}$  with the RNA Clean & Concentrator-5 kit (Zymo Research) according to  
317 the manufacturer's protocols.

## 318 Air sample sequencing

319 A modified sequence-independent single primer amplification (SISPA) approach previously  
320 described by Kafetzopoulou et al. was used to generate cDNA from the air samples<sup>20,43</sup>. First,  
321 1  $\mu\text{L}$  of Primer A (Table 2) was added to 4  $\mu\text{L}$  of concentrated viral RNA and incubated in a  
322 thermocycler at 65°C for 5 minutes, followed by 4°C for 5 minutes. To perform reverse  
323 transcription, 5  $\mu\text{L}$  of Superscript™ IV (SSIV) First-Strand Synthesis System (Invitrogen) master  
324 mix (1  $\mu\text{L}$  of dNTP (10mM), 1  $\mu\text{L}$  of nuclease-free water, 0.5  $\mu\text{L}$  of DTT (0.1 M), 2  $\mu\text{L}$  of 5X RT  
325 buffer, and 0.5  $\mu\text{L}$  of SSIV RT) was added to the reaction mix and incubated in a thermocycler

326 at 42°C for 10 minutes. To perform second-strand cDNA synthesis, 5 µL of Sequenase Version  
327 2.0 DNA polymerase (Thermo Fisher Scientific) master mix (3.85 µL of nuclease-free water, 1  
328 µL of 5X Sequenase reaction buffer, and 0.15 µL of Sequence enzyme) was added to the  
329 reaction mix and incubated at 37°C for 8 minutes. After the incubation, 0.45 µL of the  
330 Sequenase dilution buffer and 0.15 µL of Sequenase were added to the reaction mix and  
331 incubated at 37°C for 8 minutes. To amplify the randomly primed cDNA, 5 µL of the cDNA was  
332 added to 45 µL of the Primer B reaction mix (5 µL of AccuTaq LA 10x buffer, 2.5 µL of dNTP  
333 (10mM), 1 µL of DMSO, 0.5 µL of AccuTaq LA DNA polymerase, 35 µL of nuclease-free water,  
334 and 1 µL of Primer B (Table 2)). The following thermocycler conditions were used to amplify the  
335 cDNA: 98°C for 30 seconds, 30 cycles (94°C for 15 seconds, 50°C for 20 seconds, and 68°C for  
336 2 minutes), and 68°C for 10 minutes. The amplified PCR product was purified using a 1:1 ratio  
337 of AMPure XP beads (Beckman Coulter) and eluted in 25 µL of nuclease-free water. The  
338 purified PCR products were quantified with the Qubit dsDNA high-sensitivity kit (Invitrogen).

339

## 340 Oxford Nanopore sequencing

341 SISPA-prepared cDNA were submitted to the University of Wisconsin-Madison Biotechnology  
342 Center for sequencing on the Oxford Nanopore PromethION. Upon arrival, the PCR product  
343 concentrations were confirmed with the Qubit dsDNA high-sensitivity kit (Invitrogen). Libraries  
344 were prepared with up to 100-200 fmol of cDNA according to the Oxford Nanopore ligation-  
345 based sequencing kit SQK-LSK109 and Native Barcoding kit EXP-NBD196. The quality of the  
346 finished libraries was assessed using an Agilent Tapestation (Agilent) and quantified again  
347 using the Qubit® dsDNA HS Assay Kit (Invitrogen). Samples were pooled and sequenced with  
348 an FLO-PRO002 (R9.4.1) flow cell on the Oxford Nanopore PromethION 24 for 72 hours. Data



349 were basecalled using Oxford Nanopore's Guppy software package (6.4.6) with the high  
350 accuracy basecalling model (read filtering parameters: minimum length 200 bp, minimum  
351 Qscore=9). Air sample AE0000100A8B3C was also sequenced on the Oxford Nanopore  
352 GridION to obtain a greater depth of coverage across all seven influenza C virus gene  
353 segments. A sequencing library was prepared for AE0000100A8B3C according to the Oxford  
354 Nanopore ligation-based sequencing kit SQK-LSK110 instructions. The sample was  
355 sequenced with an FLO-MIN106 (R9.4) flow cell on the Oxford Nanopore GridION for 72 hours.  
356 Data were basecalled using Oxford Nanopore's Guppy software package (6.4.6) with the high  
357 accuracy basecalling model (read filtering parameters: minimum length 20 bp, minimum  
358 Qscore=9).

## 359 Sequencing analysis

360 Sequencing data generated from air samples were deposited in the Sequence Read Archive  
361 (SRA) under bioproject PRJNA950127. The removal of host reads was requested at the time of  
362 SRA submission using the Human Read Removal Tool (HRRT). The sequencing data were  
363 analyzed using a custom workflow. To ensure reproducibility and portability, we implemented  
364 the workflow in NextFlow and containerized all software dependencies with Docker. All  
365 workflow code and replication instructions are publicly available at  
366 (<https://github.com/dholab/pathogen-agnostic-sequence-analysis>). Briefly, the workflow starts  
367 by automatically pulling the study fastq files from SRA, though it has the option of merging  
368 locally stored demultiplexed fastq files as well. Then, reads are filtered to a minimum length  
369 (200bp) and quality score (Qscore=9), and adapters and barcodes are trimmed from the ends  
370 of the reads, all with the reformat.sh script in bbmap (39.01-0). The filtered fastq files for each  
371 air sample are then mapped to contaminant FASTA files containing common contaminants

372 with minimap2 (v2.22). Reads that do not map to the contaminant FASTA files are retained and  
373 mapped to their sequencing run's negative control reads to further remove contaminants  
374 present from library preparation. The cleaned fastq files for each air sample are then mapped  
375 to a RefSeq file containing human viruses downloaded from NCBI Virus using minimap2  
376 (v2.22). The human virus reference file contains 835 viral genome sequences and was  
377 processed using the bbmask.sh command in bbmap (39.01-0) with default parameters to  
378 prevent false-positive mapping to repetitive regions in viral genomes. SAM files for each  
379 sample are converted to BAM format, again with reformat.sh. The workflow then completes by  
380 generating a pivot table of pathogen "hits", which lists the number of reads supporting each  
381 mapped pathogen for each sample. For this study, we then imported the BAM alignments into  
382 Geneious Prime (2023.0.4) to inspect the mapping results visually. Genome coverage plots  
383 were created for several respiratory and enteric viruses detected in air samples using ggplot2  
384 (3.4.1) with a custom R script (4.2.3) in RStudio (2023.03.0+386).

## 385 Phylogenetic analysis

386 To compare the influenza C virus detected in the preschool air sample AE0000100A8B3C we  
387 downloaded 45 influenza C virus genome sequences for each of the seven gene segments  
388 from Genbank (HE, PB2, PB1, P3, NP, M, and NS). Accession numbers for each segment can  
389 be found in supplementary data 1. Consensus sequences were generated from  
390 AE0000100A8B3C with a minimum coverage of 20X. Sections with low coverage were masked  
391 with N and trimmed to the reference sequence length. Next, each set of influenza C virus gene  
392 segment sequences was aligned using MUSCLE (5.1) implemented in Geneious Prime  
393 (2023.0.4) with the PPP algorithm. We then used the Geneious Tree Builder (2023.0.4) to

394 construct a phylogeny for each gene segment using the Neighbor-joining method and Tamura-  
395 Nei model with 100 bootstrapped replicates.

## 396 SARS-CoV-2 RT-PCR

397 Air samples collected between December 2021 and May 2022 were tested for SARS-CoV-2  
398 viral RNA using three different SARS-CoV-2 RT-PCR assays depending on their collection  
399 location as previously described <sup>21</sup>. Air samples collected after May 2022 were tested for  
400 SARS-CoV-2 viral RNA using an RT-PCR protocol as previously described <sup>44</sup>. Briefly, viral RNA  
401 was isolated from the air sample substrate using 300  $\mu$ L of eluate and the Viral Total Nucleic  
402 Acid kit for the Maxwell 48 instrument (Promega), following the manufacturer's instructions.  
403 RNA was eluted in 50  $\mu$ L of nuclease-free water. Reverse transcription qPCR was performed  
404 using primer and probes from an assay developed by the Centers for Disease Control and  
405 Prevention to detect SARS-CoV-2 (N1 and N2 targets). The 20  $\mu$ L reaction mix contained 5  $\mu$ L  
406 of 4x TaqMan Fast Virus 1-Step Master Mix, 1.5  $\mu$ L of N1 or N2 primer/probe mix (IDT), 5  $\mu$ L of  
407 sample RNA, and 8.5  $\mu$ L of nuclease-free water. The RT-PCR amplification was run on a  
408 LightCycler 96 at the following conditions: 37°C for 2 minutes, 50°C for 15 minutes, 95°C for 2  
409 minutes, 50 cycles of 95°C for 3 seconds and 55°C for 30 seconds, and final cool down at 37°C  
410 for 30 seconds. The data were analyzed in the LightCycler 96 software 1.1 using absolute  
411 quantification analysis. Air samples were called positive when N1 and N2 targets both had  
412 cycle threshold (Ct) values <40, inconclusive when only one target had Ct <40, and negative if  
413 both targets had Ct >40.

414

## 415 References

- 416 1. CDC. COVID data tracker. *Centers for Disease Control and Prevention*  
417 <https://covid.cdc.gov/covid-data-tracker/> (2020).
- 418 2. Polo, D. *et al.* Making waves: Wastewater-based epidemiology for COVID-19 -  
419 approaches and challenges for surveillance and prediction. *Water Res.* **186**, 116404  
420 (2020).
- 421 3. Kirby, A. E. *et al.* Using Wastewater Surveillance Data to Support the COVID-19 Response  
422 - United States, 2020-2021. *MMWR Morb. Mortal. Wkly. Rep.* **70**, 1242–1244 (2021).
- 423 4. Kirby, A. E. *et al.* Notes from the Field: Early Evidence of the SARS-CoV-2 B.1.1.529  
424 (Omicron) Variant in Community Wastewater - United States, November-December 2021.  
425 *MMWR Morb. Mortal. Wkly. Rep.* **71**, 103–105 (2022).
- 426 5. McClary-Gutierrez, J. S. *et al.* SARS-CoV-2 Wastewater Surveillance for Public Health  
427 Action. *Emerg. Infect. Dis.* **27**, 1–8 (2021).
- 428 6. Yang, W., Elankumaran, S. & Marr, L. C. Concentrations and size distributions of airborne  
429 influenza A viruses measured indoors at a health centre, a day-care centre and on  
430 aeroplanes. *J. R. Soc. Interface* **8**, 1176–1184 (2011).
- 431 7. Prussin, A. J., 2nd & Marr, L. C. Sources of airborne microorganisms in the built  
432 environment. *Microbiome* **3**, 78 (2015).
- 433 8. Wang, C. C. *et al.* Airborne transmission of respiratory viruses. *Science* **373**, (2021).
- 434 9. Myatt, T. A. *et al.* Detection of airborne rhinovirus and its relation to outdoor air supply in  
435 office environments. *Am. J. Respir. Crit. Care Med.* **169**, 1187–1190 (2004).
- 436 10. Rosario, K., Fierer, N., Miller, S., Luongo, J. & Breitbart, M. Diversity of DNA and RNA  
437 Viruses in Indoor Air As Assessed via Metagenomic Sequencing. *Environ. Sci. Technol.*  
438 **52**, 1014–1027 (2018).

- 439 11. Prussin, A. J., 2nd *et al.* Seasonal dynamics of DNA and RNA viral bioaerosol communities  
440 in a daycare center. *Microbiome* **7**, 53 (2019).
- 441 12. Be, N. A. *et al.* Metagenomic analysis of the airborne environment in urban spaces.  
442 *Microb. Ecol.* **69**, 346–355 (2015).
- 443 13. Hall, R. J. *et al.* Metagenomic detection of viruses in aerosol samples from workers in  
444 animal slaughterhouses. *PLoS One* **8**, e72226 (2013).
- 445 14. Brisebois, E. *et al.* Human viral pathogens are pervasive in wastewater treatment center  
446 aerosols. *J. Environ. Sci.* **67**, 45–53 (2018).
- 447 15. Prussin, A. J., 2nd, Marr, L. C. & Bibby, K. J. Challenges of studying viral aerosol  
448 metagenomics and communities in comparison with bacterial and fungal aerosols. *FEMS*  
449 *Microbiol. Lett.* **357**, 1–9 (2014).
- 450 16. Baaijens, J. A. *et al.* Lineage abundance estimation for SARS-CoV-2 in wastewater using  
451 transcriptome quantification techniques. *Genome Biol.* **23**, 236 (2022).
- 452 17. Pan, M., Lednicky, J. A. & Wu, C.-Y. Collection, particle sizing and detection of airborne  
453 viruses. *J. Appl. Microbiol.* **127**, 1596–1611 (2019).
- 454 18. Prussin, A. J., 2nd *et al.* Viruses in the Built Environment (VIBE) meeting report.  
455 *Microbiome* **8**, 1 (2020).
- 456 19. Reyes, G. R. & Kim, J. P. Sequence-independent, single-primer amplification (SISPA) of  
457 complex DNA populations. *Mol. Cell. Probes* **5**, 473–481 (1991).
- 458 20. Kafetzopoulou, L. E. *et al.* Assessment of metagenomic Nanopore and Illumina  
459 sequencing for recovering whole genome sequences of chikungunya and dengue viruses  
460 directly from clinical samples. *Euro Surveill.* **23**, (2018).
- 461 21. Ramuta, M. D. *et al.* SARS-CoV-2 and other respiratory pathogens are detected in  
462 continuous air samples from congregate settings. *Nat. Commun.* **13**, 4717 (2022).

- 463 22. Martin, E. T., Fairchok, M. P., Stednick, Z. J., Kuypers, J. & Englund, J. A. Epidemiology of  
464 multiple respiratory viruses in childcare attendees. *J. Infect. Dis.* **207**, 982–989 (2013).
- 465 23. Bradley, R. H. & National Institute of Child Health and Human Development (NICHD) Early  
466 Child Care Research Network. Child care and common communicable illnesses in children  
467 aged 37 to 54 months. *Arch. Pediatr. Adolesc. Med.* **157**, 196–200 (2003).
- 468 24. Matsuzaki, Y. *et al.* Genetic Lineage and Reassortment of Influenza C Viruses Circulating  
469 between 1947 and 2014. *J. Virol.* **90**, 8251–8265 (2016).
- 470 25. Smith, D. B., Gaunt, E. R., Digard, P., Templeton, K. & Simmonds, P. Detection of  
471 influenza C virus but not influenza D virus in Scottish respiratory samples. *J. Clin. Virol.* **74**,  
472 50–53 (2016).
- 473 26. Dennehy, P. H., Nelson, S. M., Crowley, B. A. & Saracen, C. L. Detection of Rotavirus RNA  
474 in Hospital Air Samples by Polymerase Chain Reaction (PCR) • 828. *Pediatr. Res.* **43**, 143–  
475 143 (1998).
- 476 27. Ghosh, S. *et al.* Enteric viruses replicate in salivary glands and infect through saliva.  
477 *Nature* **607**, 345–350 (2022).
- 478 28. Zhuo, R. *et al.* Identification of Enteric Viruses in Oral Swabs from Children with Acute  
479 Gastroenteritis. *J. Mol. Diagn.* **20**, 56–62 (2018).
- 480 29. Sederdahl, B. K. & Williams, J. V. Epidemiology and Clinical Characteristics of Influenza C  
481 Virus. *Viruses* **12**, (2020).
- 482 30. Atkinson, K. V. *et al.* Influenza C in Lancaster, UK, in the winter of 2014-2015. *Sci. Rep.* **7**,  
483 46578 (2017).
- 484 31. Daniels, R. S. *et al.* Molecular Characterization of Influenza C Viruses from Outbreaks in  
485 Hong Kong SAR, China. *J. Virol.* **94**, (2020).
- 486 32. Anderson, B. D. *et al.* Bioaerosol Sampling in Modern Agriculture: A Novel Approach for

- 487 Emerging Pathogen Surveillance? *J. Infect. Dis.* **214**, 537–545 (2016).
- 488 33. Bailey, E. S., Choi, J. Y., Zemke, J., Yondon, M. & Gray, G. C. Molecular surveillance of  
489 respiratory viruses with bioaerosol sampling in an airport. *Trop Dis Travel Med Vaccines* **4**,  
490 11 (2018).
- 491 34. Coleman, K. K. *et al.* Bioaerosol Sampling for Respiratory Viruses in Singapore’s Mass  
492 Rapid Transit Network. *Sci. Rep.* **8**, 17476 (2018).
- 493 35. Mellon, G. *et al.* Air detection of monkeypox virus in a dedicated outpatient clinic room for  
494 monkeypox infection diagnosis. *J. Infect.* **86**, 256–308 (2023).
- 495 36. Rai, S., Singh, D. K. & Kumar, A. Microbial, environmental and anthropogenic factors  
496 influencing the indoor microbiome of the built environment. *J. Basic Microbiol.* **61**, 267–  
497 292 (2021).
- 498 37. Fitzpatrick, A. H. *et al.* High Throughput Sequencing for the Detection and  
499 Characterization of RNA Viruses. *Front. Microbiol.* **12**, 621719 (2021).
- 500 38. Terwilliger, A. *et al.* HIV Detection in Wastewater as a Potential Epidemiological  
501 Bellwether. (2022) doi:10.2139/ssrn.4257909.
- 502 39. Kim, K. W. *et al.* Respiratory viral co-infections among SARS-CoV-2 cases confirmed by  
503 virome capture sequencing. *Sci. Rep.* **11**, 3934 (2021).
- 504 40. Wang, Y. *et al.* SARS-CoV-2 Exposure in Norway Rats (*Rattus norvegicus*) from New York  
505 City. *MBio* e0362122 (2023).
- 506 41. Yamaguchi, J. *et al.* 548. Target Enriched NGS Reveals Wide Breadth of Viruses Causing  
507 Acute Undifferentiated Fever in Thailand. *Open Forum Infect Dis* **9**, ofac492.601 (2022).
- 508 42. *PromethION 2 Solo Technical Specification*.  
509 [https://community.nanoporetech.com/requirements\\_documents/promethion-2s-spec.pdf](https://community.nanoporetech.com/requirements_documents/promethion-2s-spec.pdf)  
510 (2022).

- 511 43. Moreno, G. K. *et al.* Revealing fine-scale spatiotemporal differences in SARS-CoV-2  
512 introduction and spread. *Nat. Commun.* **11**, 5558 (2020).
- 513 44. Newman, C. M. *et al.* Initial Evaluation of a Mobile SARS-CoV-2 RT-LAMP Testing  
514 Strategy. *J. Biomol. Tech.* **32**, 137–147 (2021).



## 515 Acknowledgments

516 This work was made possible by financial support through the National Institutes of Health  
517 grant (AAL4371). M.D.R. is supported by the National Institute of Allergy and Infectious  
518 Diseases of the National Institutes of Health under Award Number T32AI55397. The author(s)  
519 thank the University of Wisconsin Biotechnology Center DNA Sequencing Facility (Research  
520 Resource Identifier – RRID:SCR\_017759) for providing PromethION sequencing services. We  
521 would like to acknowledge Eli O’Connor’s work in developing the iOS and Android Askidd  
522 mobile app to help streamline air sample metadata collection. We would like to thank all of the  
523 participating congregations for their partnership during this study.

## 524 Author contributions

525 M.D.R contributed to the conceptualization, data curation, formal analysis,  
526 investigation, methodology, project administration, visualization, writing—original draft  
527 preparation, writing—review and editing. N.R.M contributed to the formal analysis,  
528 investigation, methodology, writing—original draft preparation, and writing—review and  
529 editing. D.H.O and S.L.O. contributed to the conceptualization, project administration,  
530 writing—original draft preparation, and writing—review and editing. M.R.S., O.E.H.,  
531 A.A., W.C.V., M.J.B., and J.R.R. contributed to data curation, logistics, organization,  
532 and writing—review and editing. L.J.B. and M.T.A. contributed to data curation,  
533 resources, project management, and writing—review and editing. S.F.B, S.W., M.L.,  
534 and M.M. contributed to logistics, organization, and writing—review and editing.

## 535 Data Availability

536 The air sample sequencing data generated in this study have been deposited in the Sequence  
537 Read Archive (SRA) under bioproject PRJNA950127. The accession numbers for influenza C  
538 virus samples used in the phylogenetic analysis are provided in Supplementary Data 1.

## 539 Code Availability

540 Code to replicate air sample sequencing analysis is available at  
541 <https://github.com/dholab/pathogen-agnostic-sequence-analysis>.

## 542 Figures and Tables

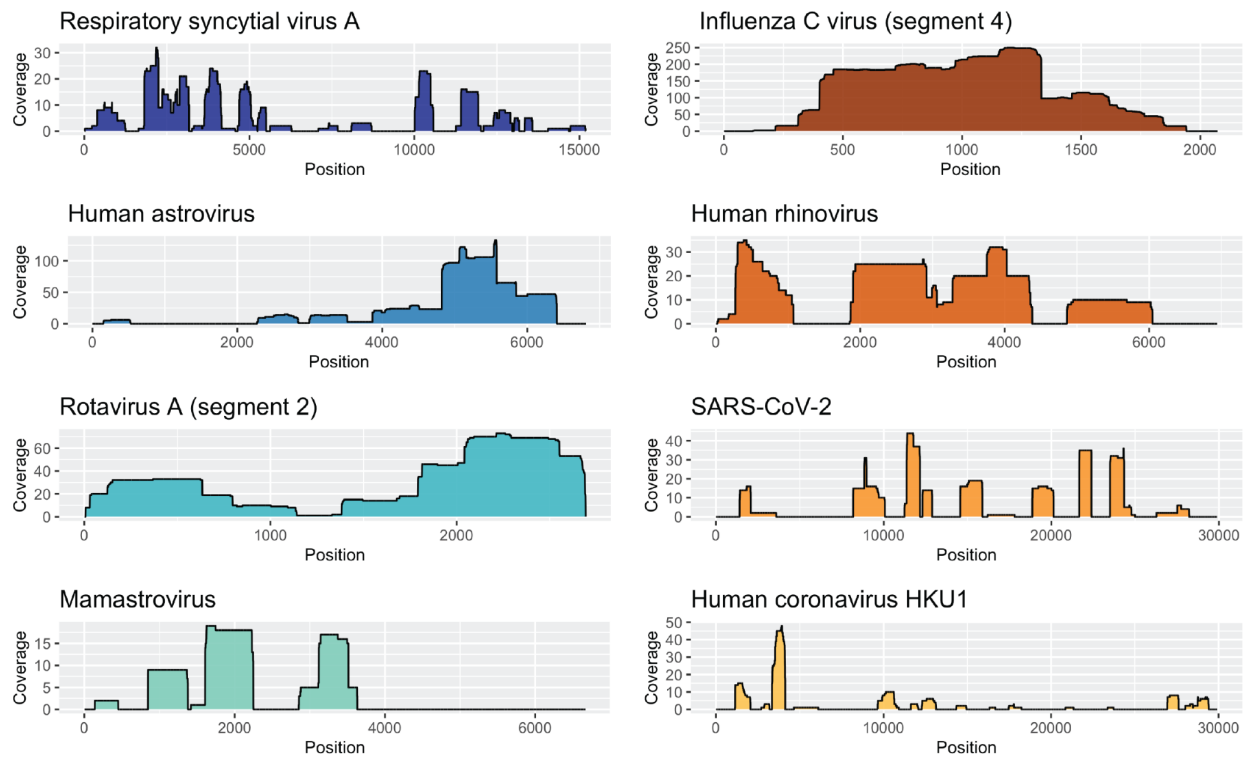

543  
544 **Figure 1. Human respiratory and enteric viruses detected in air samples by SISPA**  
545 **amplification and Oxford Nanopore sequencing.** Genome coverage plots showing read  
546 depth across eight human RNA viruses detected in air samples. The depth of coverage is  
547 shown on the y-axis, and the genome position is shown on the x-axis. The scale of the y-axis  
548 varies between plots. Coverage plots were created using ggplot2 (3.4.1) using a custom R  
549 script (4.2.3) in RStudio (2023.03.0+386).

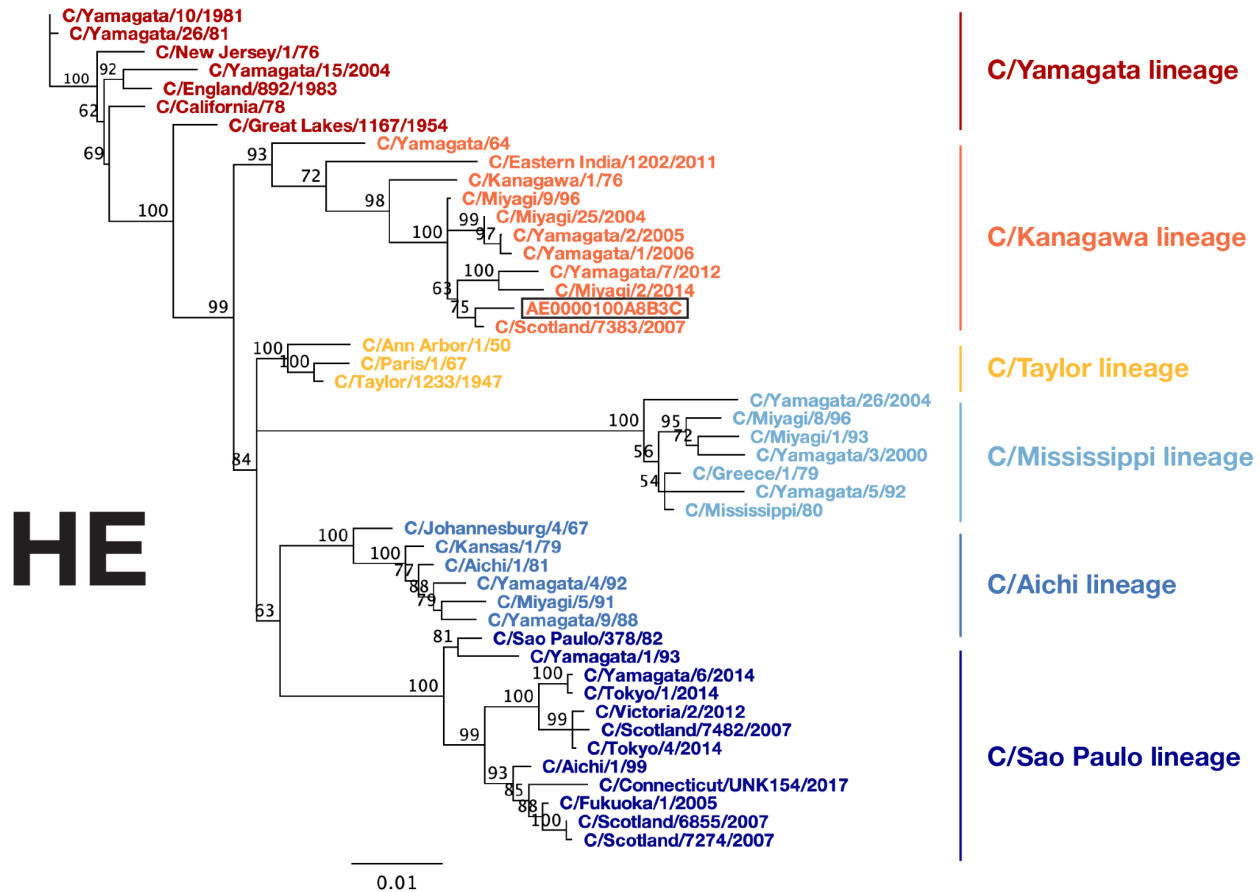

550  
 551 **Figure 2. Phylogenetic analysis of influenza C virus hemagglutinin-esterase gene.**  
 552 Phylogenetic trees for influenza C virus hemagglutinin-esterase (HE) gene segment. Nucleotide  
 553 sequences were aligned using MUSCLE (5.1). The phylogenetic tree was constructed with the  
 554 Geneious Tree Builder (2023.0.4) using the Neighbor-joining method and Tamura-Nei model  
 555 with 100 bootstrapped replicates. Numbers above the branches indicate the bootstrap values  
 556 with 100 replicates. ICV strain names are listed at the end of branches. ICV strains belonging to  
 557 the C/Sao Paulo lineage are represented in dark blue, C/Aichi lineage in blue, C/Mississippi  
 558 lineage in light blue, C/Taylor lineage in yellow, C/Kanagawa lineage in orange, C/Yamagata  
 559 lineage in red.

560 **Table 1. Human RNA viruses detected in air samples through deep sequencing with the**  
 561 **Oxford Nanopore PromethION.**  
 562

| Air sample ID  | Location                  | Start    | End      | Total number of reads | Pathogen                      | Number of mapped reads | Percent genome coverage |
|----------------|---------------------------|----------|----------|-----------------------|-------------------------------|------------------------|-------------------------|
| HC211129       | Brewery Taproom           | 11.22.21 | 11.29.21 | 4,113,547             | Rotavirus A                   | 276                    | 57.2%                   |
| AE000010795B42 | Emergency housing shelter | 12.21.21 | 1.7.22   | 4,898,090             | SARS-CoV-2                    | 266                    | 6.5%                    |
| AE00001004492C | Campus athletic facility  | 12.22.21 | 12.23.21 | 4,566,986             | Respiratory syncytial virus B | 182                    | 16.7%                   |
| AE0000100A9F46 | Preschool                 | 1.5.22   | 1.19.22  | 7,037,819             | Human astrovirus              | 70                     | 10.6%                   |
| AE0000100A8839 | Preschool                 | 1.26.22  | 2.1.22   | 4,770,197             | Human astrovirus              | 207                    | 66.3%                   |
|                |                           |          |          |                       | Respiratory syncytial virus A | 220                    | 68.9%                   |
|                |                           |          |          |                       | Mamastrovirus                 | 41                     | 26.2%                   |
|                |                           |          |          |                       | Influenza C virus             | 15                     | 9.2%                    |
| AE0000100A8B3C | Preschool                 | 2.1.22   | 2.8.22   | 4,022,365             | Influenza C virus             | 1,826                  | 95.0%                   |
|                |                           |          |          |                       | SARS-CoV-2                    | 220                    | 46.7%                   |
|                |                           |          |          |                       | Human rhinovirus              | 102                    | 68.6%                   |
|                |                           |          |          |                       | Human astrovirus              | 48                     | 40.2%                   |
|                |                           |          |          |                       | Mamastrovirus                 | 47                     | 36.8%                   |
| AE0000100A9532 | Preschool                 | 2.23.22  | 3.1.22   | 8,252,402             | Human coronavirus NL63        | 921                    | 19.3%                   |
|                |                           |          |          |                       | Influenza C virus             | 884                    | 38.83%                  |
| AE0000100C3430 | Elementary school 1       | 4.11.22  | 4.19.22  | 3,205,370             | Human coronavirus 229E        | 8                      | 13.2%                   |
| AE0000100CA130 | Elementary school 2       | 3.7.22   | 3.14.22  | 4,606,042             | Human astrovirus              | 12                     | 46.2%                   |
|                |                           |          |          |                       | Human Coronavirus NL63        | 7                      | 11%                     |
|                |                           |          |          |                       | Human coronavirus 229E        | 4                      | 6%                      |
| AE0000100CD638 | Elementary school 2       | 4.4.22   | 4.18.22  | 3,945,143             | Rotavirus A                   | 50                     | 14.93%                  |
| AE0000100CA232 | Elementary school 2       | 4.18.22  | 5.2.22   | 3,212,852             | Human coronavirus 229E        | 11                     | 5.8%                    |
| AE0000100C7A40 | Elementary school 2       | 5.2.22   | 5.9.22   | 4,958,920             | NA                            | NA                     | NA                      |
| AE0000100C702C | Elementary school 2       | 5.9.22   | 5.16.22  | 3,788,598             | Rotavirus A                   | 31                     | 37.8%                   |
| AE0000100CC536 | Elementary school 2       | 5.16.22  | 5.23.22  | 3,920,258             | Rotavirus A                   | 105                    | 40.7%                   |
| AE0000100CC63D | Elementary school 2       | 5.23.22  | 5.31.22  | 4,836,345             | Rotavirus A                   | 40                     | 7.2%                    |
|                |                           |          |          |                       | Simian Agent 10               | 7                      | 8.9%                    |
| AE000010014930 | Elementary school 2       | 11.10.22 | 11.14.22 | 8,999,110             | Human coronavirus HKU1        | 5                      | 2.2%                    |
| AE000010011724 | Elementary school 2       | 11.22.22 | 12.1.22  | 4,946,530             | Rotavirus A                   | 3                      | 10.2%                   |
| AE00001073172E | Elementary school 3       | 12.5.22  | 12.8.22  | 7560971               | Human coronavirus HKU1        | 113                    | 36.1%                   |
| AE0000FEC714A  | Middle school             | 10.31.22 | 11.3.22  | 7,421,046             | NA                            | NA                     | NA                      |
| AE0000FEC2245  | Middle school             | 12.5.22  | 12.8.22  | 9,380,984             | NA                            | NA                     | NA                      |
| AE0000106DC33E | High school               | 11.28.22 | 12.1.22  | 6,669,497             | Influenza A virus             | 30                     | 10.7%                   |
| AE0000100DE93E | Household                 | 4.22.22  | 4.26.22  | 6,810,106             | Human rhinovirus              | 17                     | 17.8%                   |
| NTC_27269_1    | No template control       | NA       | NA       | 26,833                | NA                            | NA                     | NA                      |
| NTC2_27269_2   | No template control       | NA       | NA       | 5,158                 | NA                            | NA                     | NA                      |
| NTC_28210      | No template control       | NA       | NA       | 253,439               | NA                            | NA                     | NA                      |

563  
 564 Percent genome coverage was calculated by summing the total number of basepairs with any amount of read coverage  
 565 divided by the total number of basepairs for the given virus target in the RefSeq file. Dates are listed as MM.DD.YY.  
 566 Abbreviations: NA, not applicable.

567 **Table 2. Sequence independent single primer amplification primers.**

| Primer Name | Sequence                           | Concentration |
|-------------|------------------------------------|---------------|
| Primer A    | 5'-GTT TCC CAC TGG AGG ATA-(N9)-3' | 40 pmol/μL    |
| Primer B    | 5'-GTT TCC CAC TGG AGG ATA -3'     | 100 pmol/μL   |

568
